# Supplementary material
Source: PubMed Central journal article supplement (PMC5458605)
Supplement: NIHMS863035-supplement-Supp_Fig_S1-7_TablesS1-3.pdf [file NIHMS863035-supplement-Supp_Fig_S1-7_TablesS1-3.pdf]

## New Phytologist Supporting Information

Figs S1–S7 and Tables S1–S3

Article title: PHYTOCHROME INTERACTING FACTORS (PIFs) mediate metabolic control of the circadian system in Arabidopsis

Authors: Ekaterina Shor, Inyup Paik, Shlomit Kangisser, Rachel Green and Enamul Huq

Article acceptance date: 15 March 2017

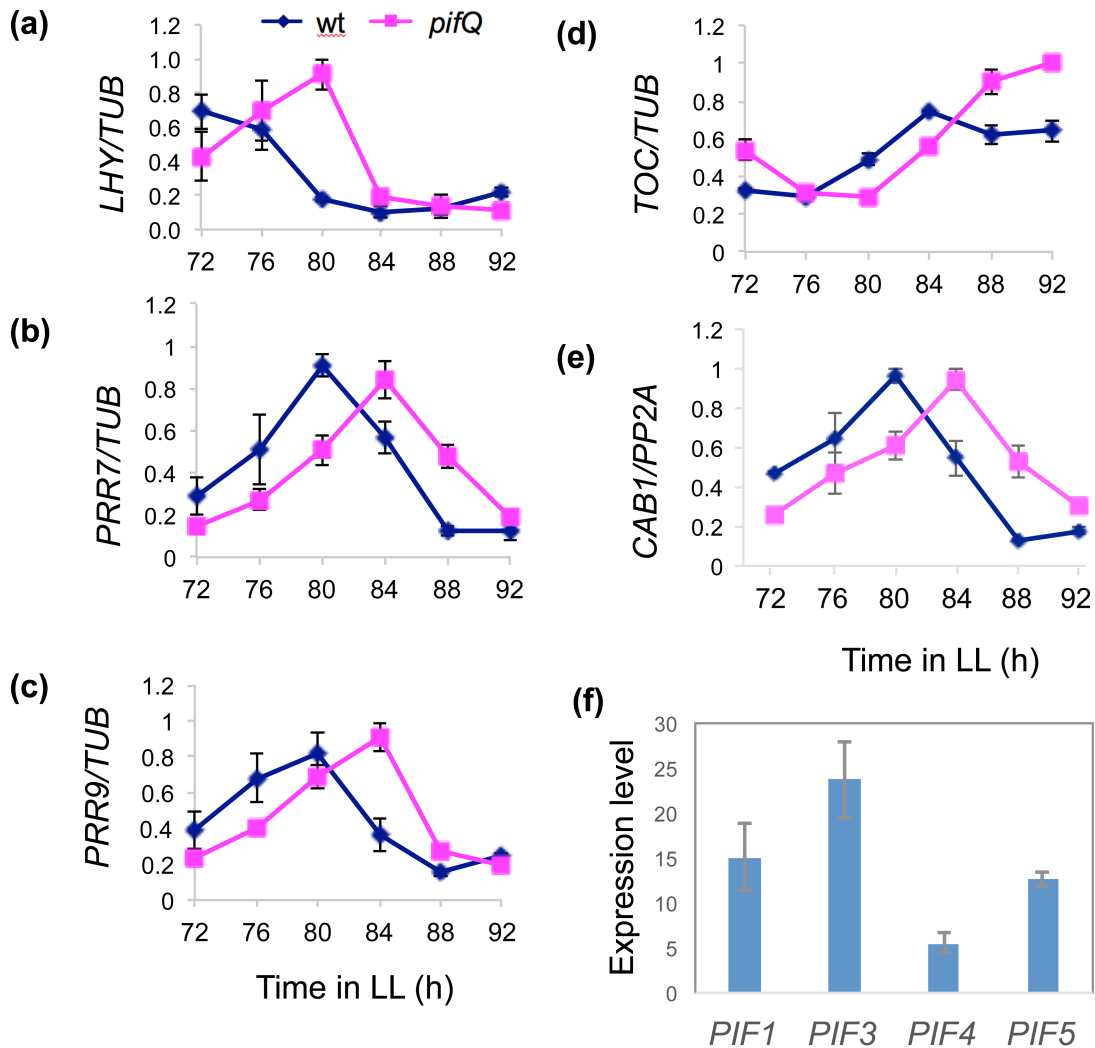

**Fig. S1** Circadian oscillator and output gene expression in *pifQ* and wt plants. *pifQ* and wt plants were grown on medium supplemented with 2% sucrose in 14 L:10 D  $100\mu\text{molm}^{-2}\text{s}^{-2}$  at  $23^\circ\text{C}$  for two weeks before being transferred to LL at the same intensity. Plants were harvested at indicated times for qRT-PCR assays. The average of 2-3 independent experiments is shown with the  $\pm$  SE. Gene expression of *LHY* (a), *PRR7* (b), *PRR9* (c), *TOC1* (d) and *CAB1* (e). Expression level for a-d was normalized to *TUB* and *CAB2* was normalized to *PP2A*. The *pifQ* mutation effects expression of all the genes ( $p < 0.001$ , two-way ANOVA time/genotype). f) Expression of four *PIF*s in the *PIF* overexpression lines used for phenotypic analysis. Seedlings were grown 7-days under white light and *PIF* gene expressions were quantified by qPCR analysis using *PP2A* as a control. Primers are listed in Table S1.

(a)

|            | Rc ( $\mu$ E) | Period length (h) |             | SEM  |             |
|------------|---------------|-------------------|-------------|------|-------------|
|            |               | wt                | <i>pifQ</i> | wt   | <i>pifQ</i> |
| 3% sucrose | 1             | 25.41             | 26.50       | 0.10 | 0.11        |
|            | 5             | 24.05             | 24.78       | 0.05 | 0.08        |
|            | 15            | 23.85             | 24.54       | 0.05 | 0.12        |
|            | 35            | 23.36             | 24.37       | 0.04 | 0.04        |
|            | 75            | 22.78             | 24.39       | 0.10 | 0.07        |
| 0% sucrose | 1             | 26.32             | 26.45       | 0.44 | 0.56        |
|            | 5             | 24.64             | 24.52       | 0.12 | 0.13        |
|            | 15            | 23.45             | 23.31       | 0.08 | 0.11        |
|            | 35            | 23.08             | 23.65       | 0.19 | 0.20        |
|            | 75            | 22.24             | 23.30       | 0.09 | 0.09        |

(b)

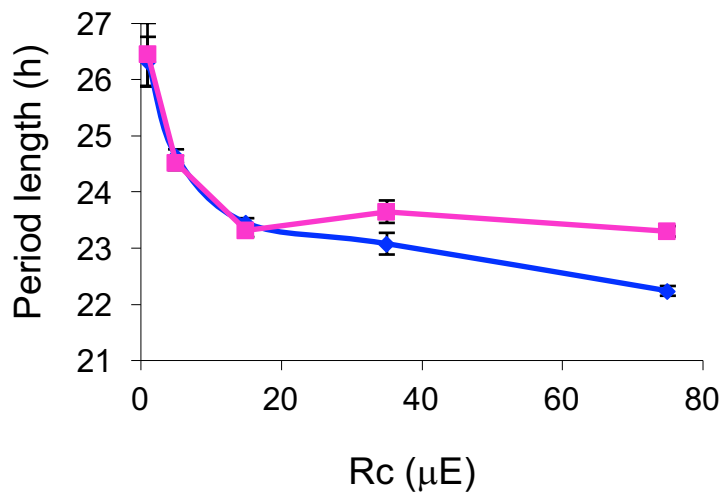

(c)

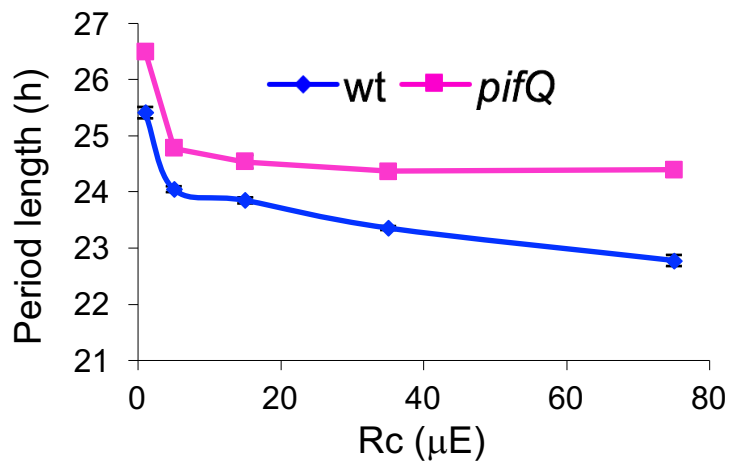

**Fig. S2** PIFs are involved in directly regulating signals from sucrose to the oscillator. (a) Table showing period lengths and SEM data for Fig. 2(a) (0% sucrose) and Fig. 3(a) (3% sucrose). (b and c) Data from Fig. 2(a) and Fig. 3(b) respectively replotted on a linear scale. Error bars indicate +/-SE.

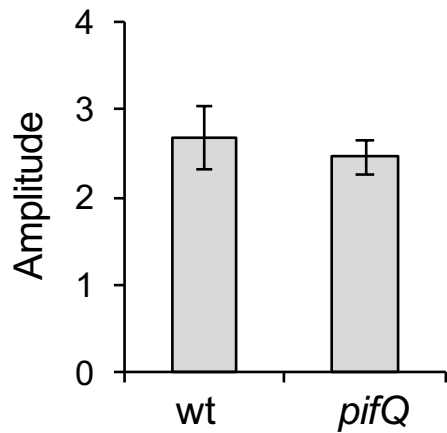

**Fig. S3** The amplitude of *CCA1:LUC* oscillations in wt and *pifQ* plants is similar. As described in Fig. 2 (c and d) *pifQ CCA1:LUC* and wt *CCA1:LUC* lines were entrained on medium without sucrose before being transferred to  $50 \mu\text{mol m}^{-2}\text{s}^{-1}$  continuous red light (Rc). The average of 2 independent experiments ( $n \geq 40$ ). Amplitude was calculated using BRASS software. Error bars indicate +/-SE.

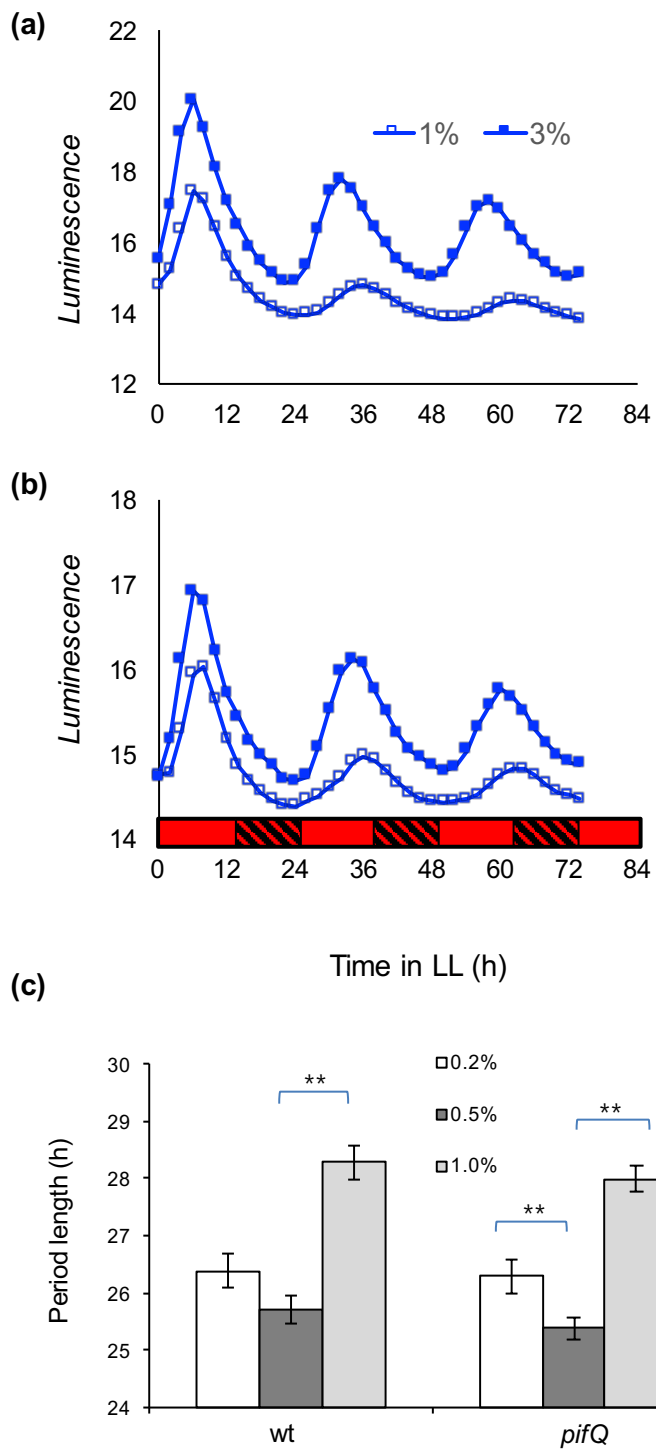

**Fig. S4** Sucrose affects rhythms in wt and *pifQ* plants. (a and b) Representative luciferase traces for (a) wt and (b) *pifQ* from Fig. 3(b). (c) Data from 0.2%, 0.5% and 1.0% sucrose in Fig. 3(b) replotted, (Student *t*-test \*\*  $p < 0.01$ ). Error bars indicate +/-SE.

(a)

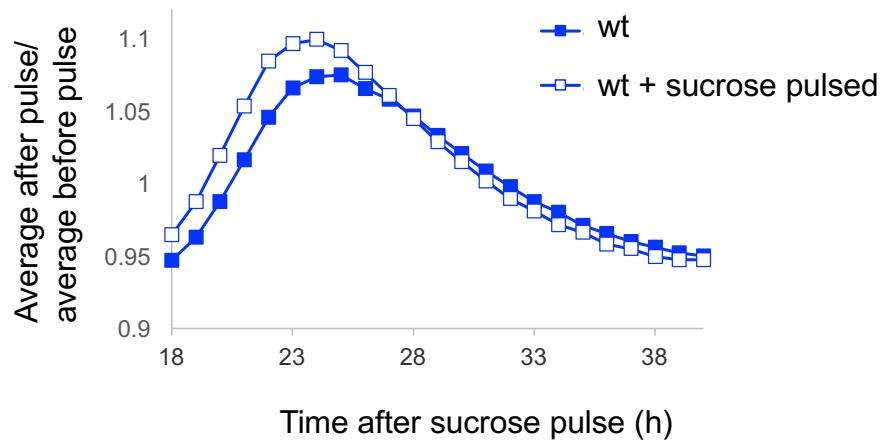

(b)

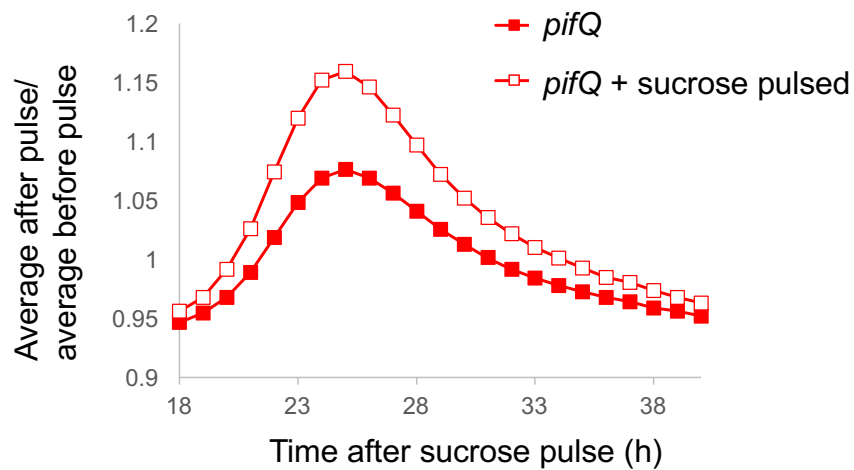

**Fig. S5** Sucrose pulses change the phase of wt but not *pifQ* plants. Phase changed in wt (a) in response to the sucrose pulse whereas in *pifQ* (b) phase remain the same. Sucrose pulse experiments were performed as described in Materials and Methods. The amplitudes of *CCA1:LUC* activity for 20 plants were calculated at each hourly time-point after the sucrose pulse and the results divided by the average amplitude 17 hours before the pulse were plotted.

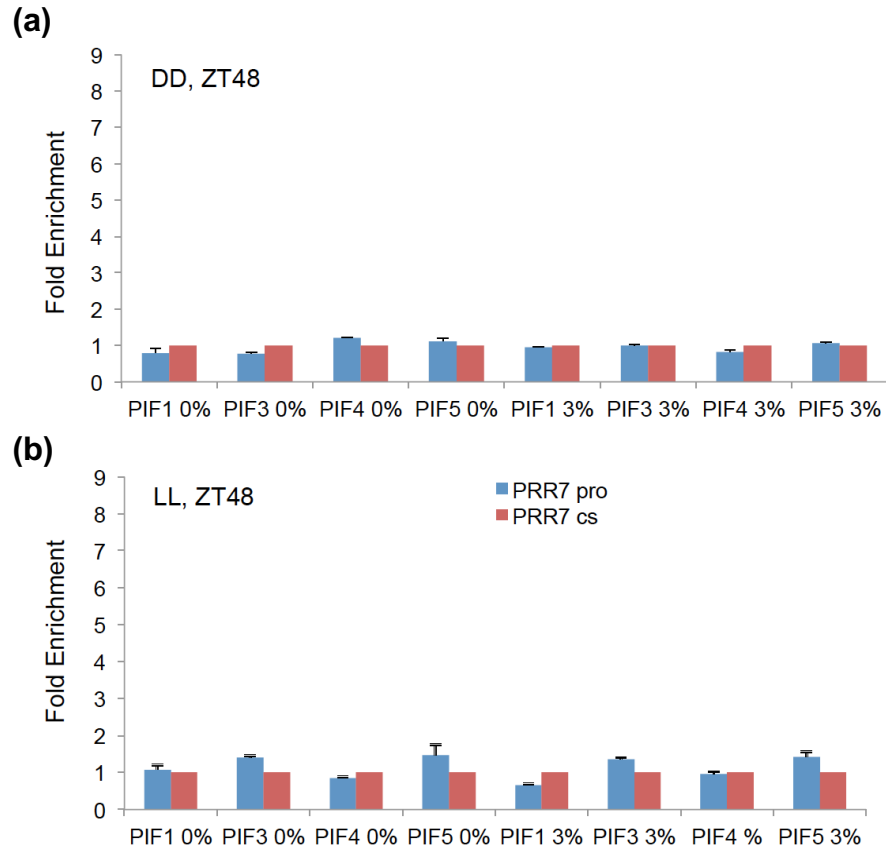

**Fig. S6.** PIFs do not directly regulate *PRR7* expression. ChIP assays on *PRR7* gene using four PIFs in the presence or absence of sucrose. Seedlings were grown with (3%) and without sucrose in 16 L:8 D for seven days and then transferred to (a) DD and (b,  $75 \mu\text{mol m}^{-2}\text{s}^{-1}$ ) LL. Samples were collected after 48 hours in DD or LL for the ChIP assays. A coding region sequence was used as control for normalization. cs, coding sequence; pro, promoter region containing G-box. Bar graph shows an average of at least 3 independent biological replicates with +/- SE.

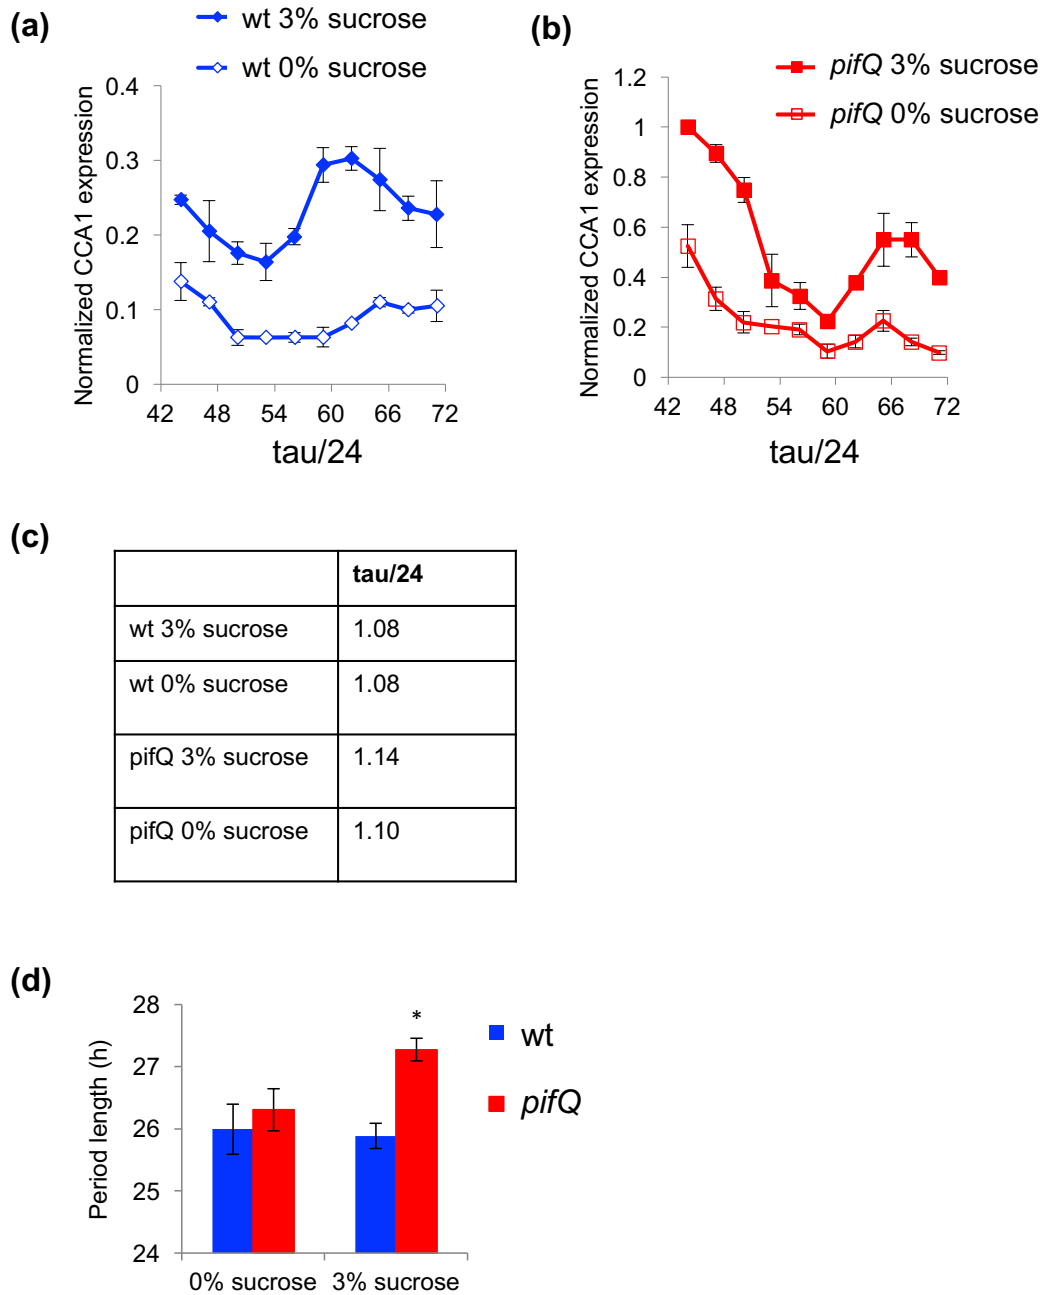

**Fig. S7.** Sucrose affects the timing of *CCA1* and *LHY* expression peaks in DD in wt plants. *pifQ* and wt plants were entrained for 10 days in 14 L:10 D 100  $\mu\text{mol m}^{-2}\text{s}^{-1}$  before being transferred to DD. Plants were harvested at indicated times for RT-qPCR assays for (a) *CCA1* and (b) *LHY*. Expression levels of *CCA1* and *LHY* was normalized with *PP2A* expression and then to the maximum for all the samples in the experiment and plotted against tau/24. (c) and (d) *pifQ CCA1:LUC* and wt *CCA1:LUC* lines were entrained on medium with or without 3% sucrose



before being transferred to DD and luciferase activity measured. (e) period length in DD ( $\tau$ )/24 for each condition/genotype. (d) The period length average of 4 independent experiments ( $n \geq 120$ ). Student *t*-test \*  $p < 0.05$ . Error bars indicate  $\pm$ SE.

## Supplementary Table S1

Primer sequences used

| <b>Gene</b>               | <b>Forward Primer</b>      | <b>Reverse Primer</b>       |
|---------------------------|----------------------------|-----------------------------|
| <b>Cloning primers</b>    |                            |                             |
| <i>pCCA1::Luc</i> cloning | cagaattcgttaacgagacgcg     | aagagctctcctgctgagcctcg     |
| <b>qRT-PCR primers</b>    |                            |                             |
| <i>CCA1</i>               | gcaacaaaaactgctgtcca       | acttcccgtctttcgaggat        |
| <i>LHY</i>                | ttcagatcagaagtcatgcaca     | gtccaaagcttggcaaacag        |
| <i>TOC1</i>               | gattccacgagtttgggaga       | tcgatatcaggtccctctgc        |
| <i>CAB1</i>               | gcctcaacaatggctctctc       | gcttggcaacagtcttctc         |
| <i>PIF1</i>               | gccaccactactgatgaaactg     | atgaacttcagcagcacgag        |
| <i>PIF3</i>               | gacggcgtgataggatcaac       | catcgaagctttgtccacct        |
| <i>PIF4</i>               | aagtcgaaccaacgatcagg       | ttgcaaagccttcattctctc       |
| <i>PIF5</i>               | cagaccagaagatgaattagt      | acggttctctacgagcttgg        |
| <i>PP2A</i>               | aaacttgcgtgagggagaaa       | ggaaaatcccacatgctgat        |
| <i>TUB</i>                | actcactacccccagctttg       | gaccagggaacctcagacag        |
| <b>ChIP qPCR Primers</b>  |                            |                             |
| <i>CCA1 control</i>       | cctcgtcagacacagacttcca     | ccgcagtagaatcagctccaata     |
| <i>CCA1 pro</i>           | tgtagtgaaccgcacgagaa       | tgtctgatacactagaaacatcagtgg |
| <i>LHY pro</i>            | ttctggctcgtagagaagcaa      | ctggaacagcaccaagggta        |
| <i>LHY control</i>        | ctcgaaagcctgggaacaac       | tccaagaacgcctgattcaa        |
| <i>PRR7 pro</i>           | ccgccaaaatctatcaacgggtccag | atggtatatcaaaaacagtcgttc    |
| <i>PRR7 control</i>       | ttggacgaaaaaagctgtggatg    | caaatttatcatcatgttcttgag    |

## Supplementary Table S2

p values for pif mutants, compared with wt by ANOVA single factor analysis and by Student's t-test.

|        | <i>pifQ</i> | <i>pif345</i> | <i>pif145</i> | <i>pif134</i> | <i>pif13</i> | <i>pif45</i> | <i>pif34</i> |
|--------|-------------|---------------|---------------|---------------|--------------|--------------|--------------|
| ANOVA  | 1.1981E-12  | 9.3421E-06    | 8.78531E-05   | 0.0004        | 0.2258       | 0.1384       | 0.0010       |
| t-test | 5.9613E-12  | 8.7008E-05    | 0.0002        | 0.0002        | 0.2836       | 0.1802       | 0.0025       |

### Supplementary Table S3

Average period for *pif* mutant leaf movements calculated with and without outliers.

|                  | <i>pif34</i> | <i>pif45</i> | <i>pif13</i> | <i>pif134</i> | <i>pif145</i> | <i>pif345</i> | <i>pifQ</i> | wt    |
|------------------|--------------|--------------|--------------|---------------|---------------|---------------|-------------|-------|
| With outliers    |              |              |              |               |               |               |             |       |
| Average          | 24.78        | 24.32        | 24.26        | 24.65         | 24.89         | 25.18         | 25.75       | 23.92 |
| SEM              | 0.23         | 0.25         | 0.27         | 0.13          | 0.20          | 0.25          | 0.17        | 0.14  |
| Without outliers |              |              |              |               |               |               |             |       |
| Average          | 24.66        | 24.37        | 24.26        | 24.65         | 24.73         | 25.02         | 25.71       | 24.00 |
| SEM              | 0.17         | 0.16         | 0.27         | 0.13          | 0.12          | 0.20          | 0.12        | 0.11  |

|                  | wt    | <i>PIF1-ox</i> | <i>PIF3-ox</i> | <i>PIF4-ox</i> | <i>PIF5-ox</i> |
|------------------|-------|----------------|----------------|----------------|----------------|
| With outliers    |       |                |                |                |                |
| Average          | 23.80 | 21.32          | 22.81          | 23.51          | 22.67          |
| SEM              | 0.23  | 0.19           | 0.18           | 0.30           | 0.18           |
| Without outliers |       |                |                |                |                |
| Average          | 23.80 | 21.32          | 22.61          | 23.66          | 22.76          |
| SEM              | 0.23  | 0.19           | 0.12           | 0.27           | 0.17           |
